# Supplementary material for: Attention-Deficit/Hyperactivity Disorder (ADHD): Integrating the MOXO-dCPT with an Eye Tracker Enhances Diagnostic Precision
Source: PubMed Central journal article supplement (PMC7664925; doi:10.3390/s20216386), 2020-11-09
Supplement: sensors-20-06386-s001.pdf [file sensors-20-06386-s001.pdf]

## Supplementary Materials

**Table S1.** Visual distractors stage: Classification accuracy of outcome measures.

| Eye Distractibility Scale |          |          | Attention Index |          |          | Timeliness Index |          |          | Hyperactivity Index |          |          | Impulsivity Index |          |          |
|---------------------------|----------|----------|-----------------|----------|----------|------------------|----------|----------|---------------------|----------|----------|-------------------|----------|----------|
| Cutoff (%)                | SPEC (%) | SENS (%) | Cutoff (%)      | SPEC (%) | SENS (%) | Cutoff (%)       | SPEC (%) | SENS (%) | Cutoff (%)          | SPEC (%) | SENS (%) | Cutoff (%)        | SPEC (%) | SENS (%) |
| 27.8                      | 100      | 27.9     | 99.8            | 97.6     | 0        | 98.0             | 95.2     | 0        | 20.0                | 97.6     | 0        | 10.5              | 100      | 9.3      |
| 25.6                      | 97.6     | 30.2     | 99.4            | 85.7     | 14       | 97.1             | 95.2     | 2.3      | 16.0                | 97.6     | 2.3      | 9.9               | 97.6     | 9.3      |
| 23.4                      | 95.2     | 32.6     | 99.1            | 64.3     | 20.9     | 95.8             | 92.9     | 4.7      | 14.0                | 97.6     | 4.7      | 9.0               | 95.2     | 9.3      |
| 22.6                      | 92.9     | 34.9     | 98.7            | 52.4     | 25.6     | 94.5             | 92.9     | 9.3      | 11.8                | 95.2     | 4.7      | 8.3               | 95.2     | 16.3     |
| 22.4                      | 88.1     | 34.9     | 98.3            | 45.2     | 34.9     | 93.6             | 90.5     | 9.3      | 11.2                | 95.2     | 7.0      | 7.9               | 95.2     | 25.6     |
| 21.2                      | 88.1     | 39.5     | —               | —        | —        | 92.5             | 88.1     | 9.3      | 10.5                | 95.2     | 9.3      | 7.5               | 95.2     | 27.9     |
| 20.7                      | 85.7     | 44.2     | —               | —        | —        | 91.4             | 88.1     | 11.6     | 9.2                 | 95.2     | 11.6     | 7.2               | 95.2     | 32.6     |
| 19.9                      | 83.3     | 46.5     | —               | —        | —        | 90.4             | 85.7     | 11.6     | 8.3                 | 95.2     | 14.0     | 6.8               | 92.9     | 39.5     |
| 18.0                      | 81.0     | 48.8     | —               | —        | —        | 89.5             | 83.3     | 11.6     | 7.9                 | 95.2     | 16.3     | 6.4               | 92.9     | 41.9     |
| 15.8                      | 81.0     | 53.5     | —               | —        | —        | 89.2             | 81       | 11.6     | 7.0                 | 92.9     | 18.6     | 6.1               | 92.9     | 44.2     |
| 15.1                      | 78.6     | 55.8     | —               | —        | —        | 88.6             | 78.6     | 11.6     | 6.1                 | 92.9     | 20.9     | 5.7               | 88.1     | 44.2     |
| 14.7                      | 73.8     | 58.1     | —               | —        | —        | 88.1             | 76.2     | 14       | 5.7                 | 92.9     | 23.3     | 5.3               | 88.1     | 46.5     |
| 14.2                      | 73.8     | 62.8     | —               | —        | —        | 87.7             | 76.2     | 16.3     | 5.3                 | 92.9     | 25.6     | 5.0               | 85.7     | 48.8     |
| 13.9                      | 71.4     | 65.1     | —               | —        | —        | 87.3             | 73.8     | 18.6     | 5.0                 | 92.9     | 27.9     | 4.6               | 83.3     | 53.5     |
| 13.7                      | 69.0     | 67.4     | —               | —        | —        | 86.9             | 71.4     | 18.6     | 4.6                 | 92.9     | 32.6     | 4.2               | 78.6     | 55.8     |
| 13.3                      | 64.3     | 67.4     | —               | —        | —        | 86.6             | 69.0     | 18.6     | 4.2                 | 92.9     | 34.9     | 3.9               | 69       | 55.8     |
| 12.8                      | 64.3     | 74.4     | —               | —        | —        | 86.2             | 66.7     | 20.9     | 3.9                 | 90.5     | 37.2     | 3.5               | 69       | 58.1     |
| 12.3                      | 57.1     | 74.4     | —               | —        | —        | 85.8             | 61.9     | 20.9     | 3.5                 | 90.5     | 39.5     | 3.1               | 61.9     | 62.8     |
| 11.0                      | 54.8     | 76.7     | —               | —        | —        | 85.5             | 59.5     | 20.9     | 3.1                 | 88.1     | 41.9     | 2.8               | 52.4     | 62.8     |
| 10.0                      | 52.4     | 79.1     | —               | —        | —        | 84.7             | 59.5     | 23.3     | 2.8                 | 83.3     | 41.9     | 2.4               | 33.3     | 67.4     |
| —                         | —        | —        | —               | —        | —        | 84.0             | 57.1     | 23.3     | 2.4                 | 81       | 44.2     | —                 | —        | —        |
| —                         | —        | —        | —               | —        | —        | 83.5             | 57.1     | 27.9     | 2.0                 | 76.2     | 51.2     | —                 | —        | —        |
| —                         | —        | —        | —               | —        | —        | 82.9             | 52.4     | 27.9     | 1.7                 | 76.2     | 58.1     | —                 | —        | —        |
| —                         | —        | —        | —               | —        | —        | 82.4             | 50       | 30.2     | 1.3                 | 66.7     | 62.8     | —                 | —        | —        |
| —                         | —        | —        | —               | —        | —        | 81.8             | 50       | 32.6     | 0.9                 | 45.2     | 67.4     | —                 | —        | —        |

Note. SENS: Sensitivity; SPEC: Specificity.
